# Supplementary material for: Sandwiched CoFe2O4/SrFe11.5Al0.5O19/CoFe2O4 nanoparticles with exchange-coupling effect
Source: Royal Society of Chemistry journal article supplement (doi:10.1039/d1nr05491k), 2021-01-01
Supplement: d1nr05491k1.pdf [file d1nr05491k1.pdf]

Supplementary Material

**Sandwiched  $\text{CoFe}_2\text{O}_4/\text{SrFe}_{11.5}\text{Al}_{0.5}\text{O}_{19}/\text{CoFe}_2\text{O}_4$  nanoparticles with exchange-coupling effect**

*Evgeny A. Gorbachev, Lev A. Trusov, Anton D. Kovalenko, Anatoly V. Morozov, and Pavel E. Kazin*

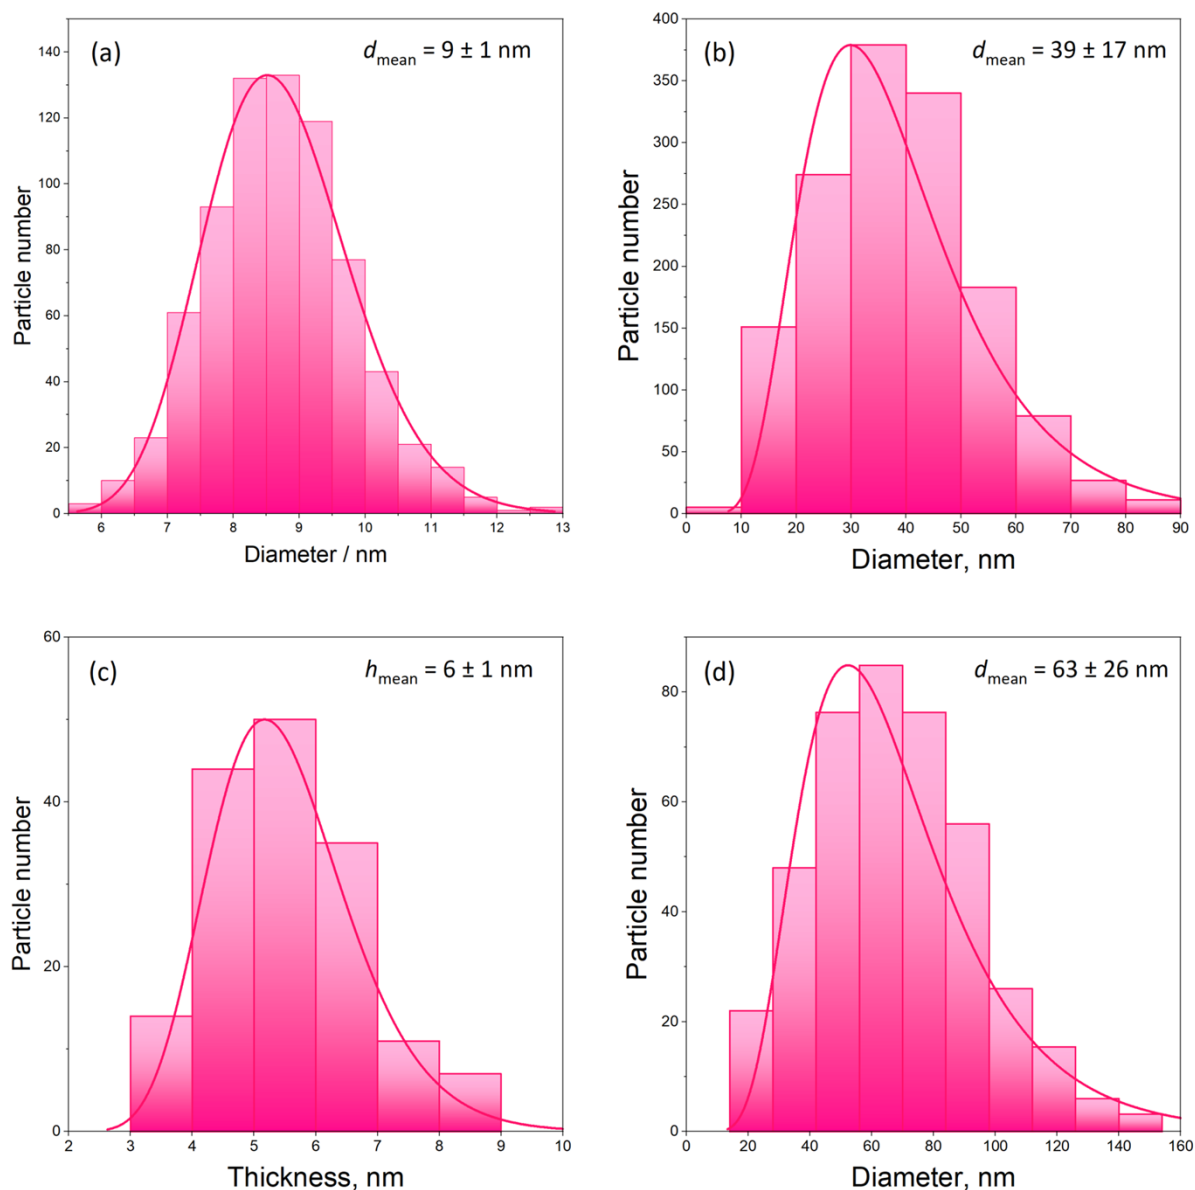

**Figure S1.** Histograms of particle diameter distributions of the  $\text{CoFe}_2\text{O}_4$  (a),  $\text{SrFe}_{11.5}\text{Al}_{0.5}\text{O}_{19}$  (b) and  $\text{CoFe}_2\text{O}_4/\text{SrFe}_{11.5}\text{Al}_{0.5}\text{O}_{19}/\text{CoFe}_2\text{O}_4$ -composite (d) samples, the thickness distribution of hexaferrite particles (c), and the lognormal function fitting.
